# Supplementary material
Source: PubMed Central journal article supplement (PMC8157952)
Supplement: pnas.2103079118.sapp.pdf [file pnas.2103079118.sapp.pdf]

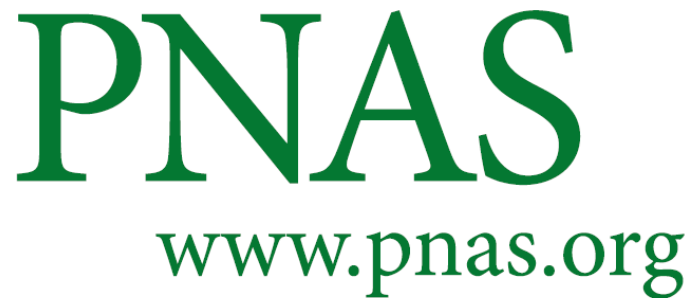

## Supplementary Information for

A key requirement for synaptic Reelin signaling in ketamine-mediated behavioral and synaptic action

Ji-Woon Kim<sup>1,2</sup>, Joachim Herz<sup>2,3,4</sup>, Ege T. Kavalali<sup>1,2</sup>, and Lisa M. Monteggia<sup>1,2</sup>

<sup>1</sup>Department of Pharmacology and the Vanderbilt Brain Institute, Vanderbilt University, Nashville, TN, 37240-7933, USA

<sup>2</sup>Department of Neuroscience, The University of Texas Southwestern Medical Center, Dallas, TX 75390-9111, USA

<sup>3</sup>Department of Molecular Genetics, The University of Texas Southwestern Medical Center, Dallas, TX 75390, USA

<sup>4</sup>Department of Neurology and Neurotherapeutics, The University of Texas Southwestern Medical Center, Dallas, TX 75390, USA

### **Corresponding author**

Lisa M. Monteggia, Ph.D.  
Department of Pharmacology  
Vanderbilt University  
465 21st Avenue South, MRB3, Room 7140  
Nashville, TN 37240-7933  
Tel 615-936-5483  
E-mail: [lisa.monteggia@vanderbilt.edu](mailto:lisa.monteggia@vanderbilt.edu)

### **This file includes:**

Fig. S1 - S5.  
Supplementary Table

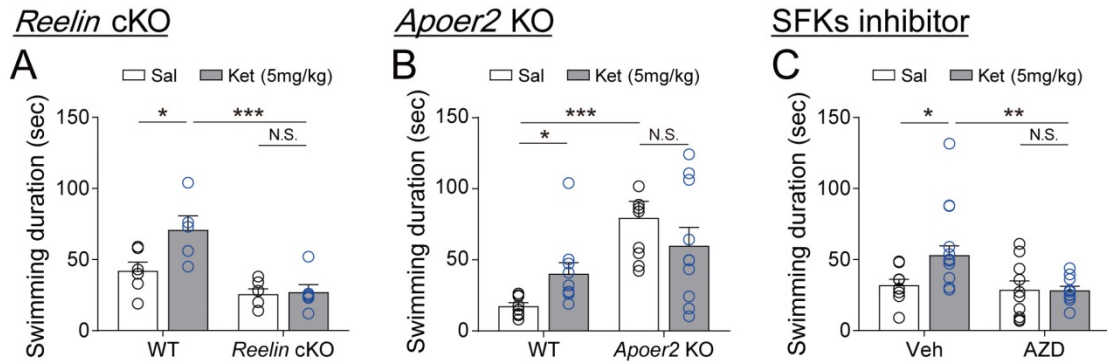

**Fig. S1. The cumulative duration of swimming in the FST.** (A - C) Cumulative swimming duration was measured in the FST with *Reelin* cKO (Fig. 1), *Apoer2* KO (Fig. 2), and AZD0530-treated mice (Fig. 3). (A) Ketamine significant increased swimming duration in the *Reelin* WT mice but not in cKO mice. Ketamine-mediated increment of swimming duration was significantly attenuated in *Reelin* cKO mice [Two-way ANOVA with Tukey's multiple comparison, Genotype x Ketamine :  $F_{(1, 19)} = 4.565$ ,  $P = 0.0459$ , Genotype factor:  $F_{(1, 19)} = 21.88$ ,  $P = 0.0002$ , Ketamine factor:  $F_{(1, 19)} = 5.494$ ,  $P = 0.0301$ ,  $n = 5 - 6$ ]. (B) Ketamine significant increased swimming duration in the *Apoer2* WT mice. Saline -treated *Apoer2* KO mice showed a significant increase in swimming duration compared to saline-treated WT mice. Ketamine did not further increase swimming duration in *Apoer2* KO mice [Data were transformed with the Box-Cox transformation for parametric statistical analysis. Two-way ANOVA with Tukey's multiple comparison, Genotype x Ketamine :  $F_{(1, 33)} = 10.97$ ,  $P = 0.0023$ , Genotype factor:  $F_{(1, 33)} = 21.06$ ,  $P < 0.0001$ , Ketamine factor:  $F_{(1, 33)} = 0.7188$ ,  $P = 0.4026$ ,  $n = 8 - 10$ ]. (C) Ketamine treatment resulted in a significant increment of swimming duration in vehicle-pretreated mice. The ketamine effects were significantly attenuated by AZD pretreatment [Two-way ANOVA with Tukey's multiple comparison, Genotype x Ketamine :  $F_{(1, 35)} = 4.199$ ,  $P = 0.0480$ , AZD factor:  $F_{(1, 35)} = 7.171$ ,  $P = 0.0112$ , Ketamine factor:  $F_{(1, 35)} = 3.918$ ,  $P = 0.0557$ ,  $n = 9 - 10$ ]. All data represented as mean  $\pm$  S.E.M. Veh: 1% DMSO in saline, AZD: AZD0530, Src family kinase inhibitor.

## I/O curves

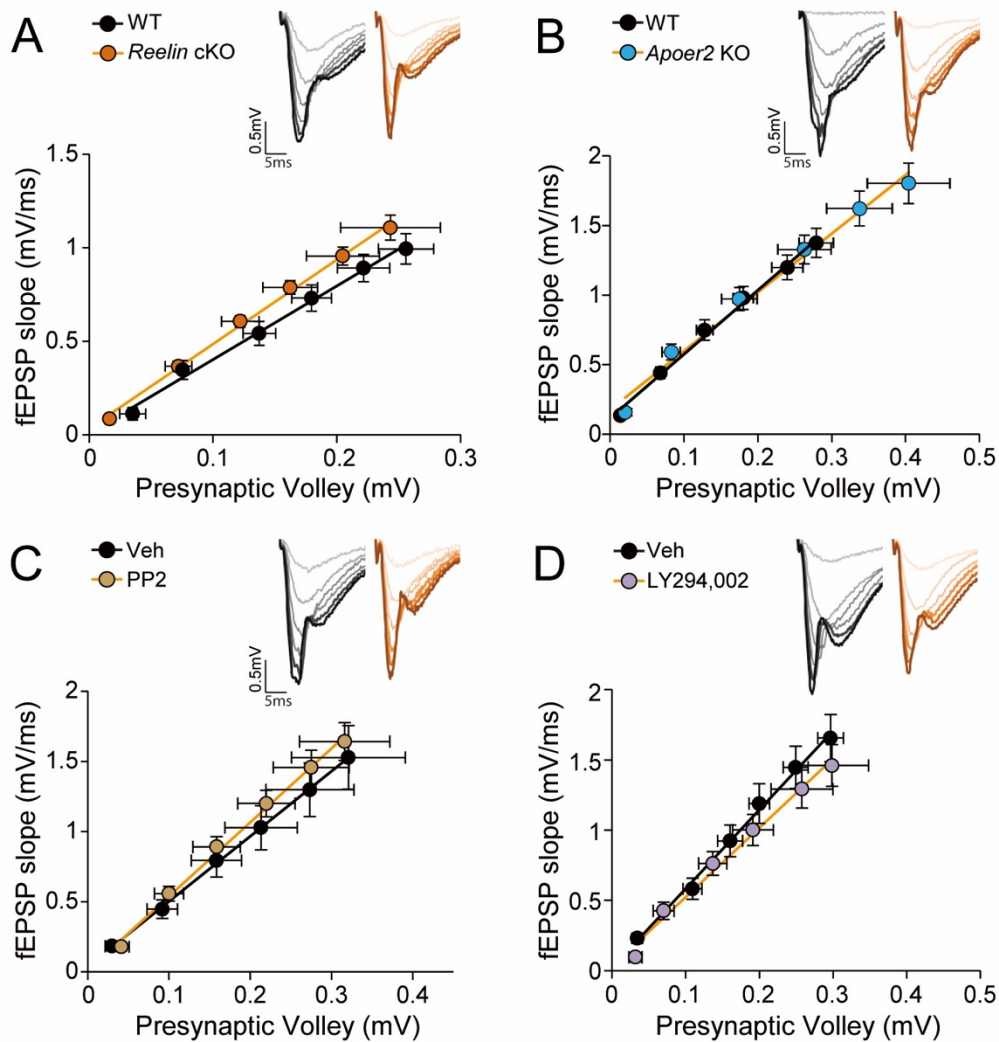

**Fig. S2. Disruption of Reelin-dependent pathway does not affect the basal neurotransmission.** (A - D) I-O curves were measured during baseline recording in the respective experimental conditions; Fig. S1A is from Fig. 1D and E. Fig. S1B is from Fig. 2F and G. Fig. S1C is from Fig. 3E and F. Fig. S1D is from Fig. 4C and D. Initial slopes of field potentials versus presynaptic volley values are plotted at 4, 8, 12, 16, 20, and 24  $\mu$ A stimulation intensity. Any significant changes in slopes were not observed in any tested datasets, as assessed by unpaired t-test (all  $P$ -values  $> 0.05$ ). All data represented as mean  $\pm$  S.E.M.

Reelin cKO

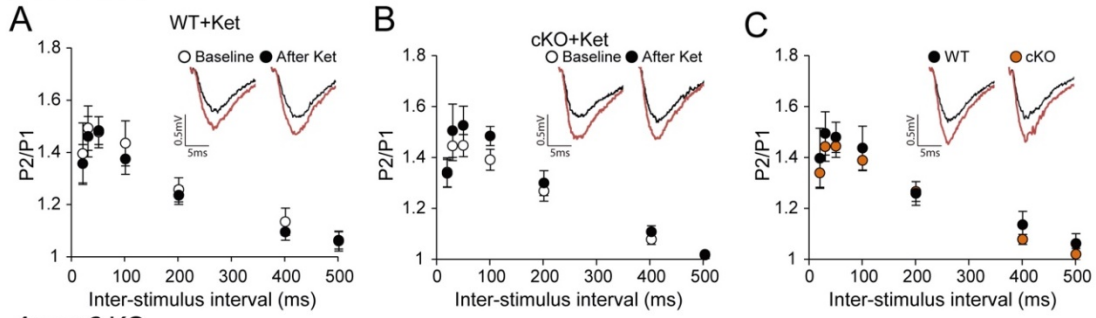

Apoer2 KO

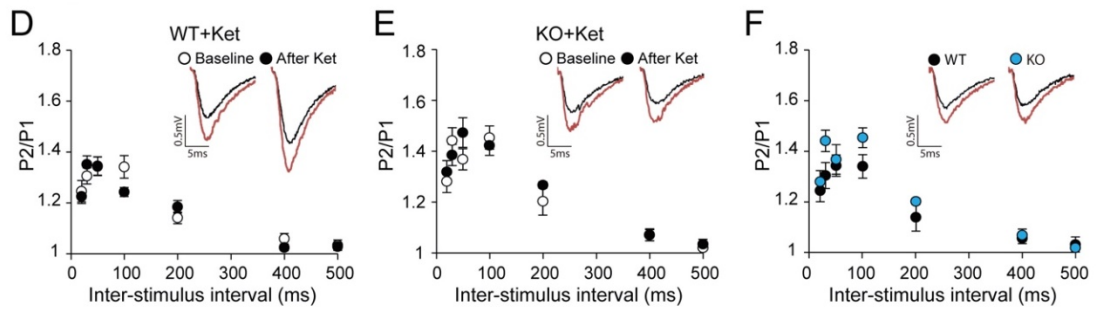

SFKs inhibitor

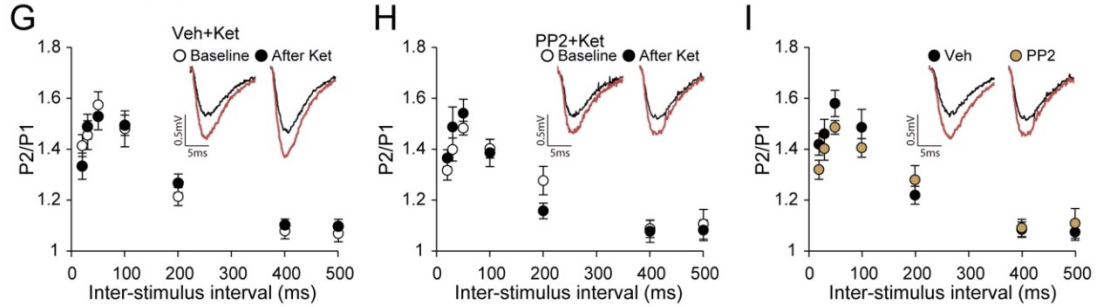

PI3K inhibitor

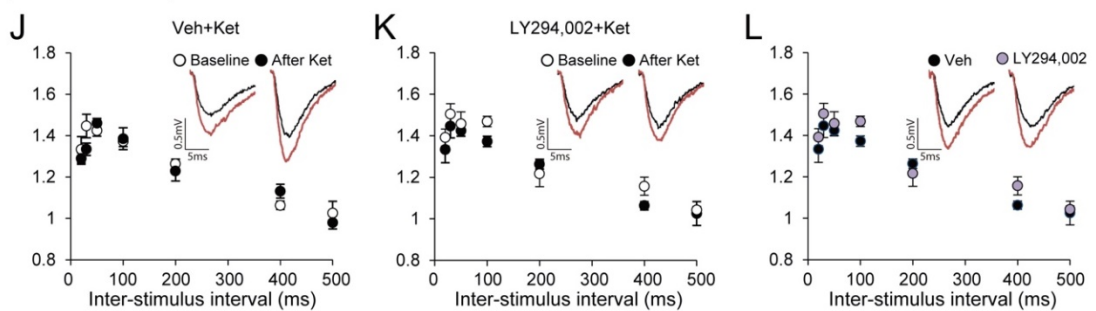

**Fig. S3. Comparison of paired-pulse ratio changes due to ketamine treatment, genotypes, or pharmacological treatments.** Paired-pulse ratios were measured with interstimulus intervals of 20, 30, 50, 100, 200, 400, and 500 ms before and after ketamine treatment. (A-C) and (D-F) were from CA1 hippocampal slices of *Reelin* cKO mice (Fig. 1B) and *Apoer2* KO mice (Fig. 2D), respectively. (G - I) and (J - L) were from hippocampal slices treated with PP2 (SFKs inhibitor, Fig. 3C) and LY294,002 (PI3K inhibitor, Fig. 4A), respectively. In the respective datasets, there

were no significant changes (Paired t-test or Wilcoxon matched-pairs signed rank test for comparisons between baseline and after ketamine group at respective inter-stimulus interval conditions in A, B, D, E, G, H, J, and K. Unpaired t-test, or Man Whitney test, for comparisons between two groups at respective inter-stimulus interval conditions in C, F, I and L. All *P*-values > 0.05 in all comparisons). All data represented as mean  $\pm$  S.E.M.

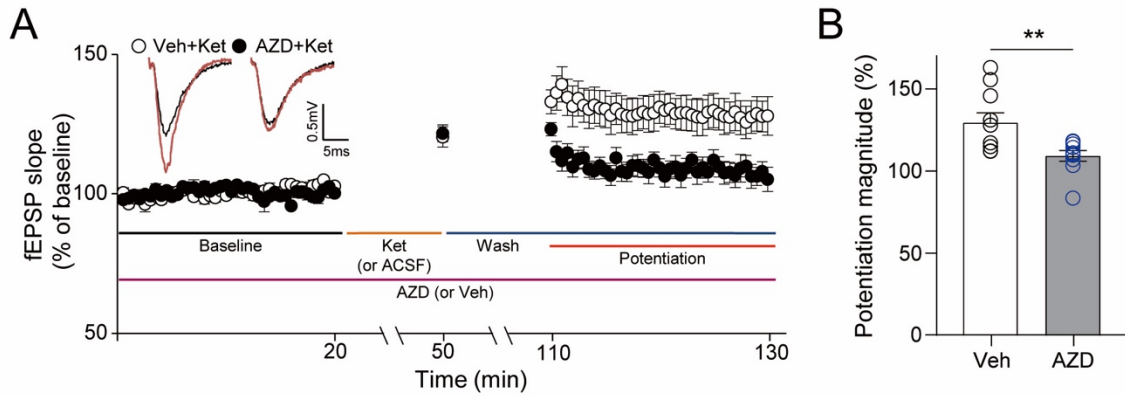

**Fig. S4. AZD0530 treatment attenuates ketamine-mediated synaptic potentiation.** AZD0530 was applied during the entire recording. fEPSPs were measured following 20 min of baseline recordings, 30 min of ketamine perfusion, and a 1 hr of washout period of the hippocampal CA1 region. All responses were normalized to respective baselines. Inset: representative waveforms during baseline (black) or ketamine-potentiation (red) measurement. (B) A bar graph summarizes the respective magnitudes of ketamine-potentiation in (A). AZD0530 attenuated ketamine-potentiation (Mann-Whitney test,  $P = 0.0089$ ,  $n = 10$  per group).

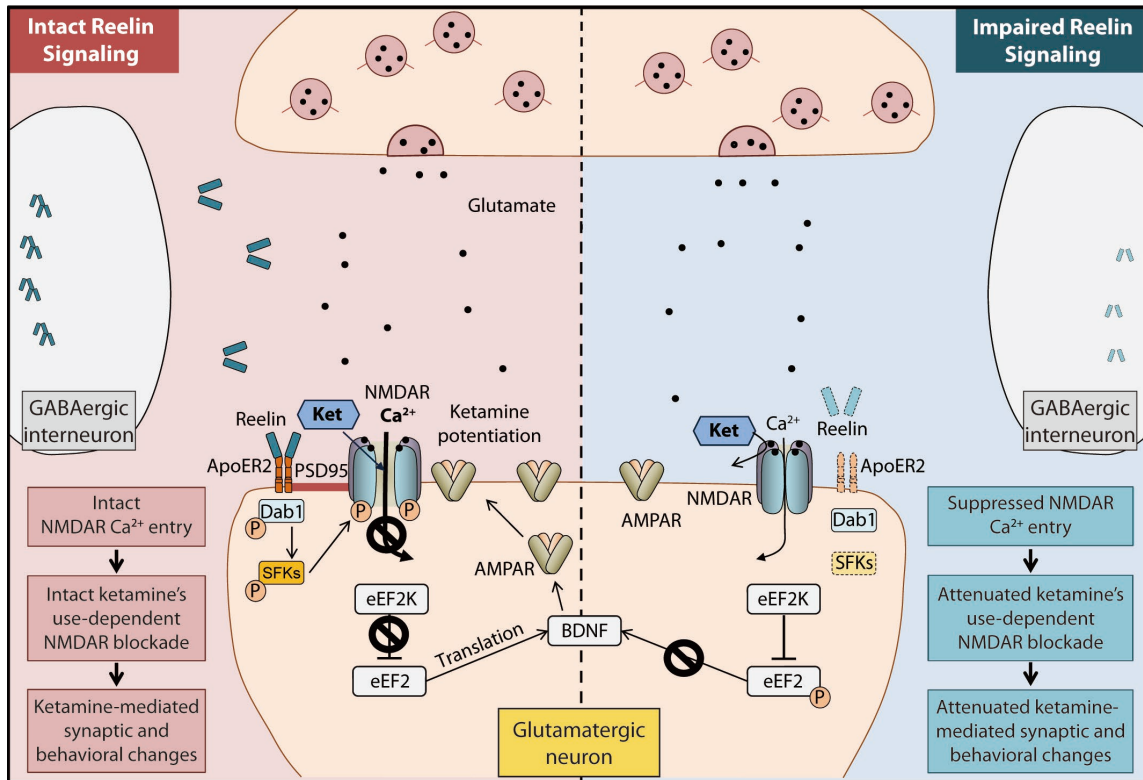

**Fig. S5. The role of Reelin in regulating basal NMDA receptor function and ketamine-mediated synaptic/behavioral changes.** Reelin is detected in GABAergic neurons within the forebrain region. Disruption of Reelin, ApoER2, or SFKs signaling (right side, weakly colored proteins with dashed outline) impairs basal NMDA receptor function, and thereby, prevents ketamine from binding to the NMDA receptor. Ketamine's diminished ability to signal via NMDAR block occludes downstream synaptic and behavioral changes.

Supplementary Table.

Figure 1A

| Group   | N number | Mean ±S.E.M   | Shapiro-Wilk (p-value) | Statistics    | Interaction                           | Genotype factor                       | Drug factor                           | Tukey's multiple comparisons<br>P-value / Significance |                        |
|---------|----------|---------------|------------------------|---------------|---------------------------------------|---------------------------------------|---------------------------------------|--------------------------------------------------------|------------------------|
| WT-Sal  | 6        | 186.7 ± 3.921 | $P = 0.788$            | Two-way ANOVA | $F_{(1, 19)} = 4.815$<br>$P = 0.0408$ | $F_{(1, 19)} = 15.68$<br>$P = 0.0008$ | $F_{(1, 19)} = 11.47$<br>$P = 0.0031$ | WT-Sal vs WT-Ket                                       | $P = 0.0054 / **$      |
| WT-Ket  | 5        | 155.8 ± 12.32 | $P = 0.689$            |               |                                       |                                       |                                       | WT-Ket vs cKO-Ket                                      | $P = 0.0022 / **$      |
| cKO-Sal | 6        | 202.3 ± 7.126 | $P = 0.1949$           |               |                                       |                                       |                                       | cKO-Sal vs cKO-Ket                                     | $P = 0.8231 /$<br>N.S. |
| cKO-Ket | 6        | 194 ± 6.202   | $P = 0.0617$           |               |                                       |                                       |                                       |                                                        |                        |

Figure 1C

| Group    | N number | Mean ±S.E.M   | Shapiro-Wilk or D'Agostino & Pearson test (p-value) | Statistics    | Interaction                           | Genotype factor                       | Drug factor                           | Tukey's multiple comparisons<br>P-value / Significance |                        |
|----------|----------|---------------|-----------------------------------------------------|---------------|---------------------------------------|---------------------------------------|---------------------------------------|--------------------------------------------------------|------------------------|
| WT-ACSF  | 5        | 89.02 ± 3.487 | $P = 0.1538$                                        | Two-way ANOVA | $F_{(1, 21)} = 37.82$<br>$P < 0.0001$ | $F_{(1, 21)} = 5.226$<br>$P = 0.0327$ | $F_{(1, 21)} = 20.50$<br>$P = 0.0002$ | WT-ACSF vs WT-Ket                                      | $P < 0.0001 / ***$     |
| WT-Ket   | 6        | 121.3 ± 2.128 | $P = 0.2943$                                        |               |                                       |                                       |                                       | WT-Ket vs cKO-Ket                                      | $P < 0.0001 / ***$     |
| cKO-ACSF | 6        | 100.7 ± 2.773 | $P = 0.4945$                                        |               |                                       |                                       |                                       | cKO-Sal vs cKO-Ket                                     | $P = 0.6225 /$<br>N.S. |
| cKO-Ket  | 8        | 95.79 ± 3.146 | $P = 0.4024$                                        |               |                                       |                                       |                                       |                                                        |                        |

Figure 1D-E

| Group | Timepoint | N number | Mean ±S.E.M    | Shapiro-Wilk or D'Agostino & Pearson test (p-value) | Statistics    | P-value /Significance                    |
|-------|-----------|----------|----------------|-----------------------------------------------------|---------------|------------------------------------------|
| WT    | Before    | 6        | 4.205 ± 0.6093 | $P = 0.1383$                                        | paired t-test | $t_{(5)} = 3.671$<br>$P = 0.0144 / *$    |
|       | After     | 6        | 5.573 ± 0.4762 | $P = 0.4382$                                        |               |                                          |
| cKO   | Before    | 8        | 5.68 ± 0.9979  | $P = 0.5188$                                        | paired t-test | $t_{(7)} = 1.129$<br>$P = 0.2961 /$ N.S. |
|       | After     | 8        | 6.204 ± 1.277  | $P = 0.2697$                                        |               |                                          |



**Figure 2A**

| Group  | N number | Mean ±S.E.M   | D'Agostino & Pearson test (p-value) | Statistics    | Interaction                                | Genotype factor                            | Drug factor                                | <i>P</i> -value (Tukey's multiple comparisons) /Significance |                          |
|--------|----------|---------------|-------------------------------------|---------------|--------------------------------------------|--------------------------------------------|--------------------------------------------|--------------------------------------------------------------|--------------------------|
| WT-Sal | 9        | 210.2 ± 4.304 | <i>P</i> = 0.3501                   | Two-way ANOVA | $F_{(1, 35)} = 7.535$<br><i>P</i> = 0.0095 | $F_{(1, 35)} = 11.36$<br><i>P</i> = 0.0018 | $F_{(1, 35)} = 1.362$<br><i>P</i> = 0.2511 | WT-Sal vs WT-Ket                                             | <i>P</i> = 0.0464 / *    |
| WT-Ket | 10       | 147 ± 15.69   | <i>P</i> = 0.2087                   |               |                                            |                                            |                                            | WT-Sal vs KO-Sal                                             | <i>P</i> = 0.0008 / ***  |
| KO-Sal | 10       | 111.4 ± 19.06 | <i>P</i> = 0.4481                   |               |                                            |                                            |                                            | KO-Sal vs KO-Ket                                             | <i>P</i> = 0.6731 / N.S. |
| KO-Ket | 10       | 136.9 ± 19.07 | <i>P</i> = 0.6124                   |               |                                            |                                            |                                            |                                                              |                          |

**Figure 2B**

| Group  | N number | Mean ±S.E.M   | Shapiro-Wilk or D'Agostino & Pearson test (p-value) | Statistics    | Interaction                                | Genotype factor                            | Drug factor                                | <i>P</i> -value (Tukey's multiple comparisons) /Significance |                          |
|--------|----------|---------------|-----------------------------------------------------|---------------|--------------------------------------------|--------------------------------------------|--------------------------------------------|--------------------------------------------------------------|--------------------------|
| WT-Sal | 7        | 90.86 ± 8.247 | <i>P</i> = 0.1445                                   | Two-way ANOVA | $F_{(1, 27)} = 8.509$<br><i>P</i> = 0.0070 | $F_{(1, 27)} = 3.194$<br><i>P</i> = 0.0851 | $F_{(1, 27)} = 2.413$<br><i>P</i> = 0.1319 | WT-Sal vs WT-Ket                                             | <i>P</i> = 0.0325 / *    |
| WT-Ket | 6        | 43.50 ± 6.238 | <i>P</i> = 0.1389                                   |               |                                            |                                            |                                            | WT-Ket vs KO-Ket                                             | <i>P</i> = 0.0152 / *    |
| KO-Sal | 9        | 78.89 ± 9.536 | <i>P</i> = 0.9455                                   |               |                                            |                                            |                                            | KO-Sal vs KO-Ket                                             | <i>P</i> = 0.7193 / N.S. |
| KO-Ket | 9        | 93.33 ± 13.03 | <i>P</i> = 0.3954                                   |               |                                            |                                            |                                            |                                                              |                          |

**Figure 2C**

| Group  | N number | Mean ±S.E.M     | Shapiro-Wilk or D'Agostino & Pearson test (p-value) | Statistics    | Interaction                                | Genotype factor                            | Drug factor                                | <i>P</i> -value (Tukey's multiple comparisons) /Significance |                          |
|--------|----------|-----------------|-----------------------------------------------------|---------------|--------------------------------------------|--------------------------------------------|--------------------------------------------|--------------------------------------------------------------|--------------------------|
| WT-Sal | 7        | 0.3360 ± 0.0170 | <i>P</i> = 0.7101                                   | Two-way ANOVA | $F_{(1, 27)} = 0.803$<br><i>P</i> = 0.3782 | $F_{(1, 27)} = 1.352$<br><i>P</i> = 0.2551 | $F_{(1, 27)} = 2.087$<br><i>P</i> = 0.1591 | WT-Sal vs WT-Ket                                             | <i>P</i> = 0.4308 / N.S. |
| WT-Ket | 6        | 0.3917 ± 0.0256 | <i>P</i> = 0.0716                                   |               |                                            |                                            |                                            | KO-Sal vs KO-Ket                                             | <i>P</i> = 0.9733 / N.S. |
| KO-Sal | 9        | 0.3297 ± 0.0263 | <i>P</i> = 0.2564                                   |               |                                            |                                            |                                            |                                                              |                          |
| KO-Ket | 9        | 0.3428 ± 0.0214 | <i>P</i> = 0.7569                                   |               |                                            |                                            |                                            |                                                              |                          |

**Figure 2E**

| Group   | N number | Mean ±S.E.M   | D'Agostino & Pearson test (p-value) | Statistics    | Interaction                          | Genotype factor                      | Drug factor                          | P-value (Tukey's multiple comparisons) /Significance |                     |
|---------|----------|---------------|-------------------------------------|---------------|--------------------------------------|--------------------------------------|--------------------------------------|------------------------------------------------------|---------------------|
| WT-ACSF | 8        | 96.93 ± 4.119 | $P = 0.6951$                        | Two-way ANOVA | $F_{(1,36)} = 5.181$<br>$P = 0.0289$ | $F_{(1,36)} = 8.669$<br>$P = 0.0056$ | $F_{(1,36)} = 21.62$<br>$P < 0.0001$ | WT-ACSF vs WT-Ket                                    | $P = 0.0001 / ***$  |
| WT-Ket  | 12       | 124 ± 3.631   | $P = 0.8297$                        |               |                                      |                                      |                                      | WT-Ket vs KO-Ket                                     | $P = 0.0011 / **$   |
| KO-ACSF | 8        | 94.32 ± 4.057 | $P = 0.5805$                        |               |                                      |                                      |                                      | KO-ACSF vs KO-Ket                                    | $P = 0.3496 / N.S.$ |
| KO-Ket  | 12       | 103.6 ± 3.555 | $P = 0.1109$                        |               |                                      |                                      |                                      |                                                      |                     |

**Figure 2F-G**

| Group | Timepoint | N number | Mean ±S.E.M    | D'Agostino & Pearson test (p-value) | Statistics    | P-value /Significance                   |
|-------|-----------|----------|----------------|-------------------------------------|---------------|-----------------------------------------|
| WT    | Before    | 10       | 4.83 ± 0.4855  | $P = 0.8535$                        | paired t-test | $t_{(9)} = 3.334$<br>$P = 0.0087 / **$  |
|       | After     | 10       | 8.917 ± 0.1445 | $P = 0.8662$                        |               |                                         |
| KO    | Before    | 11       | 5.8 ± 0.9422   | $P = 0.2961$                        | paired t-test | $t_{(10)} = 3.709$<br>$P = 0.0040 / **$ |
|       | After     | 11       | 7.162 ± 1.201  | $P = 0.0651$                        |               |                                         |

**Figure 3A**

| Target protein | Group | N number | Mean ±S.E.M     | Shapiro-Wilk (p-value) | Statistics      | P-value /Significance                     |
|----------------|-------|----------|-----------------|------------------------|-----------------|-------------------------------------------|
| pGluN2A/GluN2A | Veh   | 7        | 1 ± 0.0800      | $P = 0.5696$           | unpaired t-test | $t_{(12)} = 2.423$<br>$P = 0.0322 / *$    |
|                | AZD   | 7        | 0.6706 ± 0.1099 | $P = 0.8908$           |                 |                                           |
| pGluN2B/GluN2B | Veh   | 6        | 1 ± 0.0774      | $P = 0.896$            | unpaired t-test | $t_{(11)} = 1.459$<br>$P = 0.1727 / N.S.$ |
|                | AZD   | 7        | 0.8302 ± 0.0848 | $P = 0.9424$           |                 |                                           |

**Figure 3B**

| Group   | N number | Mean ±S.E.M   | D'Agostino & Pearson test (p-value) | Statistics    | Interaction                           | AZD factor                            | Ketamine factor                       | P-value (Tukey's multiple comparisons) /Significance |                     |
|---------|----------|---------------|-------------------------------------|---------------|---------------------------------------|---------------------------------------|---------------------------------------|------------------------------------------------------|---------------------|
| Veh-Sal | 9        | 182.2 ± 2.803 | $P = 0.6655$                        | Two-way ANOVA | $F_{(1, 35)} = 5.285$<br>$P = 0.0276$ | $F_{(1, 35)} = 3.740$<br>$P = 0.0613$ | $F_{(1, 35)} = 2.514$<br>$P = 0.1218$ | Veh-Sal vs Veh-Ket                                   | $P = 0.0485 / *$    |
| Veh-Ket | 10       | 149.0 ± 10.4  | $P = 0.1454$                        |               |                                       |                                       |                                       | Veh-Ket vs AZD-Ket                                   | $P = 0.0224 / *$    |
| AZD-Veh | 10       | 179.1 ± 11.46 | $P = 0.1584$                        |               |                                       |                                       |                                       | AZD-Veh vs AZD-Ket                                   | $P = 0.9559 / N.S.$ |
| AZD-Ket | 10       | 185.2 ± 5.571 | $P = 0.6276$                        |               |                                       |                                       |                                       |                                                      |                     |

**Figure 3D**

| Group    | N number | Mean ±S.E.M  | Shapiro-Wilk or D'Agostino & Pearson test (p-value) | Statistics    | Interaction                           | PP2 factor                            | Ketamine factor                       | P-value (Tukey's multiple comparisons) /Significance |                     |
|----------|----------|--------------|-----------------------------------------------------|---------------|---------------------------------------|---------------------------------------|---------------------------------------|------------------------------------------------------|---------------------|
| Veh-ACSF | 7        | 97.62 ± 2.81 | $P = 0.6275$                                        | Two-way ANOVA | $F_{(1, 28)} = 1.706$<br>$P = 0.2021$ | $F_{(1, 28)} = 5.095$<br>$P = 0.0320$ | $F_{(1, 28)} = 18.51$<br>$P = 0.0002$ | Veh-ACSF vs Veh-Ket                                  | $P = 0.0022 / **$   |
| Veh-Ket  | 9        | 119 ± 2.58   | $P = 0.3234$                                        |               |                                       |                                       |                                       | Veh-Ket vs PP2-Ket                                   | $P = 0.0430 / *$    |
| PP2-ACSF | 6        | 93.99 ± 5.22 | $P = 0.4248$                                        |               |                                       |                                       |                                       | PP2-ACSF vs PP2-Ket                                  | $P = 0.1801 / N.S.$ |
| PP2-Ket  | 10       | 105.4 ± 4.08 | $P = 0.4484$                                        |               |                                       |                                       |                                       |                                                      |                     |

**Figure 3E-F**

| Group   | Timepoint | N number | Mean ±S.E.M    | D'Agostino & Pearson test (p-value) | Statistics                              | P-value /Significance |
|---------|-----------|----------|----------------|-------------------------------------|-----------------------------------------|-----------------------|
| Veh-Ket | Before    | 9        | 5.038 ± 0.4876 | $P = 0.0349$                        | Wilcoxon matched-pairs signed rank test | $P = 0.0039 / **$     |
|         | After     | 9        | 8.367 ± 1.416  | $P = 0.2193$                        |                                         |                       |
| PP2-Ket | Before    | 9        | 5.487 ± 0.5279 | $P = 0.0002$                        | Wilcoxon matched-pairs signed rank test | $P = 0.0117 / **$     |
|         | After     | 9        | 6.325 ± 0.567  | $P = 0.0007$                        |                                         |                       |

**Figure 3G**

| Protein            | Group    | N number | Mean ±S.E.M     | D'Agostino & Pearson test (p-value) | Statistics    | Interaction                           | Ketamine factor                       | PP2 factor                           | P-value (Tukey's multiple comparisons) /Significance |                    |
|--------------------|----------|----------|-----------------|-------------------------------------|---------------|---------------------------------------|---------------------------------------|--------------------------------------|------------------------------------------------------|--------------------|
| pGluN2A/<br>GluN2A | Veh-ACSF | 9        | 1 ± 0.1822      | $P = 0.9567$                        | Two-way ANOVA | $F_{(1,30)} = 1.373$<br>$P = 0.2505$  | $F_{(1,30)} = 1.452$<br>$P = 0.2376$  | $F_{(1,30)} = 30.32$<br>$P < 0.0001$ | Veh-ACSF vs PP2-ACSF                                 | $P = 0.0225$ / *   |
|                    | PP2-ACSF | 8        | 0.1167 ± 0.0550 | $P = 0.3418$                        |               |                                       |                                       |                                      | Veh-Ket vs PP2-Ket                                   | $P = 0.0003$ / *** |
|                    | Veh-Ket  | 9        | 1.484 ± 0.3316  | $P = 0.5592$                        |               |                                       |                                       |                                      |                                                      |                    |
|                    | PP2-Ket  | 8        | 0.1235 ± 0.0379 | $P = 0.1076$                        |               |                                       |                                       |                                      |                                                      |                    |
| pGluN2B/<br>GluN2B | Veh-ACSF | 9        | 1 ± 0.0997      | $P = 0.9257$                        | Two-way ANOVA | $F_{(1,32)} = 0.0051$<br>$P = 0.9431$ | $F_{(1,32)} = 0.4409$<br>$P = 0.5114$ | $F_{(1,32)} = 43.67$<br>$P < 0.0001$ | Veh-ACSF vs PP2-ACSF                                 | $P = 0.0002$ / *** |
|                    | PP2-ACSF | 9        | 0.3878 ± 0.0690 | $P = 0.1729$                        |               |                                       |                                       |                                      | Veh-Ket vs PP2-Ket                                   | $P = 0.0003$ / *** |
|                    | Veh-Ket  | 9        | 1.054 ± 0.106   | $P = 0.5246$                        |               |                                       |                                       |                                      |                                                      |                    |
|                    | PP2-Ket  | 9        | 0.4553 ± 0.0874 | $P = 0.4185$                        |               |                                       |                                       |                                      |                                                      |                    |

**Figure 4B**

| Group    | N number | Mean ±S.E.M    | Shapiro-Wilk or D'Agostino & Pearson test (p-value) | Statistics    | Interaction                           | LY294,002 factor                     | Ketamine factor                      | P-value (Tukey's multiple comparisons) /Significance |                     |
|----------|----------|----------------|-----------------------------------------------------|---------------|---------------------------------------|--------------------------------------|--------------------------------------|------------------------------------------------------|---------------------|
| Veh-ACSF | 7        | 100.6 ± 1.534  | $P = 0.9884$                                        | Two-way ANOVA | $F_{(1,25)} = 0.3351$<br>$P = 0.5678$ | $F_{(1,25)} = 0.661$<br>$P = 0.4239$ | $F_{(1,25)} = 27.23$<br>$P < 0.0001$ | Veh-ACSF vs Veh-Ket                                  | $P = 0.0024$ / **   |
| Veh-Ket  | 7        | 122.2 ± 6.489  | $P = 0.3527$                                        |               |                                       |                                      |                                      | Veh-Ket vs LY-Ket                                    | $P = 0.8187$ / N.S. |
| LY-ACSF  | 8        | 97.27 ± 3.573  | $P = 0.9545$                                        |               |                                       |                                      |                                      | LY-ACSF vs LY-Ket                                    | $P = 0.0133$ / *    |
| LY-Ket   | 7        | 117.5 ± 0.5029 | $P = 0.9134$                                        |               |                                       |                                      |                                      |                                                      |                     |

**Figure 4C-D**

| Group   | Timepoint | N number | Mean ±S.E.M    | Shapiro-Wilk (p-value) | Statistics    | P-value /Significance                  |
|---------|-----------|----------|----------------|------------------------|---------------|----------------------------------------|
| Veh-Ket | Before    | 7        | 6.207 ± 0.8157 | $P = 0.9804$           | paired t-test | $t_{(6)} = 3.737$<br>$P = 0.0097$ / ** |
|         | After     | 7        | 10.24 ± 1.411  | $P = 0.5596$           |               |                                        |
| LY-Ket  | Before    | 7        | 5.140 ± 0.5879 | $P = 0.6968$           | paired t-test | $t_{(6)} = 4.528$<br>$P = 0.0040$ / ** |
|         | After     | 7        | 8.257 ± 0.8264 | $P = 0.5476$           |               |                                        |

**Figure 4E**

| Protein  | Group    | N number | Mean ±S.E.M     | Shapiro-Wilk or D'Agostino & Pearson test (p-value) | Statistics    | Interaction                           | Ketamine factor                      | LY294,002 factor                     | P-value (Tukey's multiple comparisons) /Significance |                      |
|----------|----------|----------|-----------------|-----------------------------------------------------|---------------|---------------------------------------|--------------------------------------|--------------------------------------|------------------------------------------------------|----------------------|
| pAKT/AKT | Veh-ACSF | 7        | 1 ± 0.1868      | $P = 0.6718$                                        | Two-way ANOVA | $F_{(1,25)} = 0.7331$<br>$P = 0.4000$ | $F_{(1,25)} = 0.0690$<br>$P = 0.795$ | $F_{(1,25)} = 26.89$<br>$P < 0.0001$ | Veh-ACSF vs LY-ACSF                                  | $P = 0.0011$<br>/ ** |
|          | LY-ACSF  | 8        | 0.1802 ± 0.0603 | $P = 0.2859$                                        |               |                                       |                                      |                                      | Veh-Ket vs LY-Ket                                    | $P = 0.0280$<br>/ *  |
|          | Veh-Ket  | 7        | 0.9195 ± 0.1895 | $P = 0.3956$                                        |               |                                       |                                      |                                      |                                                      |                      |
|          | LY-Ket   | 7        | 0.332 ± 0.0596  | $P = 0.7827$                                        |               |                                       |                                      |                                      |                                                      |                      |

**Figure 5B**

| Protein        | Time   | N number | Mean ±S.E.M     | Shapiro-Wilk or D'Agostino & Pearson test (p-value) | Statistics      | P-value /Significance                      |
|----------------|--------|----------|-----------------|-----------------------------------------------------|-----------------|--------------------------------------------|
| Reelin/GAPDH   | 10 min | 10       | 1 ± 0.1145      | $P = 0.9857$                                        | unpaired t-test | $t_{(18)} = 0.0266$<br>$P = 0.9791$ / N.S. |
|                |        | 10       | 0.9945 ± 0.1727 | $P = 0.9664$                                        |                 |                                            |
|                | 30 min | 7        | 1 ± 0.1659      | $P = 0.1861$                                        |                 | $t_{(12)} = 0.3503$<br>$P = 0.7322$ / N.S. |
|                |        | 7        | 1.079 ± 0.1523  | $P = 0.892$                                         |                 |                                            |
| pGluN2A/GluN2A | 10 min | 10       | 1 ± 0.1009      | $P = 0.9762$                                        | unpaired t-test | $t_{(18)} = 2.133$<br>$P = 0.047$ / *      |
|                |        | 10       | 1.473 ± 0.1977  | $P = 0.7931$                                        |                 |                                            |
|                | 30 min | 8        | 1 ± 0.1064      | $P = 0.7136$                                        |                 | $t_{(14)} = 1.292$<br>$P = 0.2173$ / N.S.  |
|                |        | 8        | 1.24 ± 0.1523   | $P = 0.8386$                                        |                 |                                            |
| pGluN2B/GluN2B | 10 min | 10       | 1 ± 0.1138      | $P = 0.3091$                                        | unpaired t-test | $t_{(18)} = 0.2721$<br>$P = 0.7887$ / N.S. |
|                |        | 10       | 0.9539 ± 0.1257 | $P = 0.3913$                                        |                 |                                            |
|                | 30 min | 8        | 1 ± 0.1777      | $P = 0.2934$                                        |                 | $t_{(14)} = 0.6826$<br>$P = 0.5060$ / N.S. |
|                |        | 8        | 0.8487 ± 0.1325 | $P = 0.5695$                                        |                 |                                            |
| pAKT/AKT       | 10 min | 10       | 1 ± 0.0289      | $P = 0.3323$                                        | unpaired t-test | $t_{(18)} = 0.8431$<br>$P = 0.4103$ / N.S. |
|                |        | 10       | 1.038 ± 0.0346  | $P = 0.3439$                                        |                 |                                            |
|                | 30 min | 8        | 1 ± 0.0674      | $P = 0.6518$                                        |                 | $t_{(14)} = 0.7883$<br>$P = 0.4436$ / N.S. |
|                |        | 8        | 0.9148 ± 0.0845 | $P = 0.3947$                                        |                 |                                            |

**Figure 5C**

| Protein        | Time   | N number | Mean<br>±S.E.M  | Shapiro-Wilk<br>(p-value) | Statistics      | P-value<br>/Significance                         |
|----------------|--------|----------|-----------------|---------------------------|-----------------|--------------------------------------------------|
| pTyr-DAB1/DAB1 | 10 min | 4        | 1 ± 0.0452      | $P = 0.3648$              | unpaired t-test | $t_{(7)} = 0.2300$<br>$P = 0.8246 / \text{N.S.}$ |
|                |        | 5        | 0.9868 ± 0.0367 | $P = 0.6141$              |                 |                                                  |

**Figure 5D**

| Group     | N number | Mean<br>±S.E.M  | D'Agostino & Pearson test<br>(p-value) | Statistics      | P-value<br>/Significance               |
|-----------|----------|-----------------|----------------------------------------|-----------------|----------------------------------------|
| WT        | 11       | 0.8791 ± 0.0768 | $P = 0.676$                            | unpaired t-test | $t_{(22)} = 2.652$<br>$P = 0.0146 / *$ |
| ApoER2 KO | 13       | 0.6375 ± 0.0531 | $P = 0.9352$                           |                 |                                        |

**Figure 5E**

| Group | N number | Mean<br>±S.E.M  | D'Agostino & Pearson test<br>(p-value) | Statistics          | P-value<br>/Significance               |
|-------|----------|-----------------|----------------------------------------|---------------------|----------------------------------------|
| Veh   | 10       | 1.224 ± 0.1533  | $P = 0.349$                            | unpaired t-<br>test | $t_{(22)} = 2.430$<br>$P = 0.0237 / *$ |
| PP2   | 14       | 0.8581 ± 0.0663 | $P = 0.4869$                           |                     |                                        |

**Supplementary Figure 1A**

| Group   | N number | Mean ±S.E.M   | Shapiro-Wilk (p-value) | Statistics    | Interaction                          | Genotype factor                      | Drug factor                          | P-value (Tukey's multiple comparisons) /Significance |                     |
|---------|----------|---------------|------------------------|---------------|--------------------------------------|--------------------------------------|--------------------------------------|------------------------------------------------------|---------------------|
| WT-Sal  | 6        | 34.5 ± 4.015  | $P = 0.1727$           | Two-way ANOVA | $F_{(1,19)} = 4.565$<br>$P = 0.0459$ | $F_{(1,19)} = 21.88$<br>$P = 0.0002$ | $F_{(1,19)} = 5.494$<br>$P = 0.0301$ | WT-Sal vs WT-Ket                                     | $P = 0.0279$ / *    |
| WT-Ket  | 5        | 62.4 ± 9.432  | $P = 0.932$            |               |                                      |                                      |                                      | WT-Ket vs cKO-Ket                                    | $P = 0.0006$ / ***  |
| cKO-Sal | 6        | 24.0 ± 4.058  | $P = 0.3465$           |               |                                      |                                      |                                      | cKO-Sal vs cKO-Ket                                   | $P = 0.9987$ / N.S. |
| cKO-Ket | 6        | 25.33 ± 4.256 | $P = 0.2721$           |               |                                      |                                      |                                      |                                                      |                     |

**Supplementary Figure 1B**

| Group  | N number | Mean ±S.E.M   | D'Agostino & Pearson test (p-value) | Box-cox transformation [D'Agostino & Pearson test (p-value)] | Statistics    | Interaction                          | Genotype factor                      | Drug factor                           | P-value (Tukey's multiple comparisons) /Significance |                     |
|--------|----------|---------------|-------------------------------------|--------------------------------------------------------------|---------------|--------------------------------------|--------------------------------------|---------------------------------------|------------------------------------------------------|---------------------|
| WT-Sal | 8        | 17.19 ± 2.506 | $P = 0.3003$                        | $P = 0.6241$                                                 | Two-way ANOVA | $F_{(1,33)} = 10.97$<br>$P = 0.0023$ | $F_{(1,33)} = 21.06$<br>$P < 0.0001$ | $F_{(1,33)} = 0.7188$<br>$P = 0.4026$ | WT-Sal vs WT-Ket                                     | $P = 0.0322$ / *    |
| WT-Ket | 10       | 40.01 ± 7.765 | $P = 0.0002$                        | $P = 0.0858$                                                 |               |                                      |                                      |                                       | WT-Sal vs KO-Sal                                     | $P < 0.0001$ / ***  |
| KO-Sal | 9        | 79.32 ± 11.66 | $P = 0.1288$                        | $P = 0.8881$                                                 |               |                                      |                                      |                                       | KO-Sal vs KO-Ket                                     | $P = 0.3052$ / N.S. |
| KO-Ket | 10       | 59.68 ± 12.94 | $P = 0.4611$                        | $P = 0.6489$                                                 |               |                                      |                                      |                                       |                                                      |                     |

**Supplementary Figure 1C**

| Group   | N number | Mean ±S.E.M   | D'Agostino & Pearson test (p-value) | Statistics    | Interaction                          | AZD factor                           | Ketamine factor                      | P-value (Tukey's multiple comparisons) /Significance |                     |
|---------|----------|---------------|-------------------------------------|---------------|--------------------------------------|--------------------------------------|--------------------------------------|------------------------------------------------------|---------------------|
| Veh-Sal | 9        | 31.97 ± 4.074 | $P = 0.7536$                        | Two-way ANOVA | $F_{(1,35)} = 4.199$<br>$P = 0.0480$ | $F_{(1,35)} = 7.171$<br>$P = 0.0112$ | $F_{(1,35)} = 3.918$<br>$P = 0.0557$ | Veh-Sal vs Veh-Ket                                   | $P = 0.0384$ / *    |
| Veh-Ket | 10       | 53.11 ± 6.565 | $P = 0.4648$                        |               |                                      |                                      |                                      | AZD-Sal vs AZD-Ket                                   | $P > 0.9999$ / N.S. |
| AZD-Sal | 10       | 28.67 ± 6.264 | $P = 0.5008$                        |               |                                      |                                      |                                      | Veh-Ket vs AZD-Ket                                   | $P = 0.0091$ / **   |
| AZD-Ket | 10       | 28.30 ± 2.939 | $P = 0.9369$                        |               |                                      |                                      |                                      |                                                      |                     |

**Supplementary Figure 2**

| Figure number | Group      | N number | Mean ±S.E.M    | Shapiro-Wilk or D'Agostino & Pearson test (p-value) | Statistics      | P-value /Significance                             |
|---------------|------------|----------|----------------|-----------------------------------------------------|-----------------|---------------------------------------------------|
| A             | WT         | 6        | 4.172 ± 0.6237 | $P = 0.2383$                                        | unpaired t-test | $t_{(12)} = 1.178$<br>$P = 0.2616 / \text{N.S.}$  |
|               | Reelin cKO | 8        | 5.68 ± 0.9979  | $P = 0.2678$                                        |                 |                                                   |
| B             | WT         | 10       | 4.83 ± 0.4855  | $P = 0.8535$                                        | unpaired t-test | $t_{(19)} = 0.3410$<br>$P = 0.7368 / \text{N.S.}$ |
|               | Apoer2 KO  | 11       | 5.165 ± 0.8245 | $P = 0.2961$                                        |                 |                                                   |
| C             | Veh        | 9        | 5.038 ± 0.4876 | $P = 0.186$                                         | unpaired t-test | $t_{(16)} = 0.6248$<br>$P = 0.5409 / \text{N.S.}$ |
|               | PP2        | 9        | 5.487 ± 0.5279 | $P = 0.2088$                                        |                 |                                                   |
| D             | Veh        | 7        | 6.207 ± 0.8157 | $P = 0.9604$                                        | unpaired t-test | $t_{(12)} = 1.209$<br>$P = 0.2498 / \text{N.S.}$  |
|               | LY294,002  | 7        | 4.979 ± 0.6038 | $P = 0.6244$                                        |                 |                                                   |

**Supplementary Figure 3A**

| Group                               | Interstimulus interval | Group  | Number | Shapiro-Wilk (p-value) | statistics                              | Mean ±S.E.M    | P-value /Significance                         |
|-------------------------------------|------------------------|--------|--------|------------------------|-----------------------------------------|----------------|-----------------------------------------------|
| <i>Reelin</i> WT<br>before vs after | 20                     | Before | 6      | $P = 0.8771$           | paired t-test                           | 1.399 ± 0.1183 | $t(5) = 0.3573$<br>$P = 0.7355 / \text{N.S.}$ |
|                                     |                        | after  | 6      | $P = 0.1648$           |                                         | 1.361 ± 0.0733 |                                               |
|                                     | 30                     | Before | 6      | $P = 0.9382$           | paired t-test                           | 1.497 ± 0.0847 | $t(5) = 0.7335$<br>$P = 0.4962 / \text{N.S.}$ |
|                                     |                        | after  | 6      | $P = 0.615$            |                                         | 1.465 ± 0.0772 |                                               |
|                                     | 50                     | Before | 6      | $P = 0.6013$           | paired t-test                           | 1.482 ± 0.0595 | $t(5) = 1.691$<br>$P = 0.9448 / \text{N.S.}$  |
|                                     |                        | after  | 6      | $P = 0.3286$           |                                         | 1.487 ± 0.0534 |                                               |
|                                     | 100                    | Before | 6      | $P = 0.9059$           | paired t-test                           | 1.439 ± 0.0863 | $t(5) = 1.491$<br>$P = 0.1961 / \text{N.S.}$  |
|                                     |                        | after  | 6      | $P = 0.9492$           |                                         | 1.379 ± 0.0585 |                                               |
|                                     | 200                    | Before | 6      | $P = 0.9532$           | paired t-test                           | 1.261 ± 0.0464 | $t(5) = 0.8270$<br>$P = 0.4459 / \text{N.S.}$ |
|                                     |                        | after  | 6      | $P = 0.6698$           |                                         | 1.24 ± 0.0348  |                                               |
|                                     | 400                    | Before | 6      | $P = 0.9836$           | Wilcoxon matched-pairs signed rank test | 1.138 ± 0.0520 | $P = 0.5288 / \text{N.S.}$                    |
|                                     |                        | after  | 6      | $P = 0.003$            |                                         | 1.099 ± 0.0311 |                                               |
|                                     | 500                    | Before | 6      | $P = 0.7594$           | paired t-test                           | 1.064 ± 0.0382 | $t(5) = 1.355$<br>$P = 0.2333 / \text{N.S.}$  |
|                                     |                        | after  | 6      | $P = 0.2666$           |                                         | 1.067 ± 0.0328 |                                               |



**Supplementary Figure 3B**

| Group                             | Interstimulus interval | Group  | Number | D'Agostino & Pearson test (p-value) | statistics                              | Mean ±S.E.M        | P-value /Significance                            |
|-----------------------------------|------------------------|--------|--------|-------------------------------------|-----------------------------------------|--------------------|--------------------------------------------------|
| <i>Reelin</i> cKO before vs after | 20                     | Before | 8      | $P = 0.7198$                        | paired t-test                           | $1.342 \pm 0.0672$ | $t_{(7)} = 0.1206$<br>$P = 0.9074 / \text{N.S.}$ |
|                                   |                        | after  | 8      | $P = 0.816$                         |                                         | $1.338 \pm 0.0645$ |                                                  |
|                                   | 30                     | Before | 8      | $P = 0.4328$                        | Wilcoxon matched-pairs signed rank test | $1.445 \pm 0.0679$ | $P = 0.4609 / \text{N.S.}$                       |
|                                   |                        | after  | 8      | $P = 0.0011$                        |                                         | $1.503 \pm 0.1239$ |                                                  |
|                                   | 50                     | Before | 8      | $P = 0.0581$                        | Wilcoxon matched-pairs signed rank test | $1.446 \pm 0.0516$ | $P = 0.1953 / \text{N.S.}$                       |
|                                   |                        | after  | 8      | $P = 0.0267$                        |                                         | $1.524 \pm 0.09$   |                                                  |
|                                   | 100                    | Before | 8      | $P = 0.9157$                        | paired t-test                           | $1.391 \pm 0.0490$ | $t_{(7)} = 1.741$<br>$P = 0.1253 / \text{N.S.}$  |
|                                   |                        | after  | 8      | $P = 0.2421$                        |                                         | $1.483 \pm 0.0449$ |                                                  |
|                                   | 200                    | Before | 8      | $P = 0.5991$                        | paired t-test                           | $1.268 \pm 0.0462$ | $t_{(7)} = 0.6486$<br>$P = 0.5373 / \text{N.S.}$ |
|                                   |                        | after  | 8      | $P = 0.3373$                        |                                         | $1.3 \pm 0.0579$   |                                                  |
|                                   | 400                    | Before | 8      | $P = 0.6636$                        | paired t-test                           | $1.08 \pm 0.0234$  | $t_{(7)} = 0.6918$<br>$P = 0.5114 / \text{N.S.}$ |
|                                   |                        | after  | 8      | $P = 0.7229$                        |                                         | $1.11 \pm 0.0286$  |                                                  |
|                                   | 500                    | Before | 8      | $P = 0.9321$                        | paired t-test                           | $1.022 \pm 0.0269$ | $t_{(7)} = 0.0604$<br>$P = 0.9535 / \text{N.S.}$ |
|                                   |                        | after  | 8      | $P = 0.3875$                        |                                         | $1.019 \pm 0.0165$ |                                                  |

**Supplementary Figure 3C**

| Group                   | Interstimulus interval | Group | Number | Shapiro-Wilk or D'Agostino & Pearson test (p-value) | statistics      | Mean ±S.E.M        | P-value /Significance                             |
|-------------------------|------------------------|-------|--------|-----------------------------------------------------|-----------------|--------------------|---------------------------------------------------|
| <i>Reelin</i> WT vs cKO | 20                     | WT    | 6      | $P = 0.8771$                                        | unpaired t-test | $1.399 \pm 0.1183$ | $t_{(14)} = 0.0331$<br>$P = 0.6624 / \text{N.S.}$ |
|                         |                        | cKO   | 8      | $P = 0.7198$                                        |                 | $1.342 \pm 0.0672$ |                                                   |
|                         | 30                     | WT    | 6      | $P = 0.9382$                                        | unpaired t-test | $1.497 \pm 0.0847$ | $t_{(14)} = 0.1522$<br>$P = 0.6346 / \text{N.S.}$ |
|                         |                        | cKO   | 8      | $P = 0.4328$                                        |                 | $1.445 \pm 0.0679$ |                                                   |
|                         | 50                     | WT    | 6      | $P = 0.6013$                                        | unpaired t-test | $1.482 \pm 0.0595$ | $t_{(14)} = 0.3346$<br>$P = 0.6853 / \text{N.S.}$ |
|                         |                        | cKO   | 8      | $P = 0.0581$                                        |                 | $1.446 \pm 0.0516$ |                                                   |
|                         | 100                    | WT    | 6      | $P = 0.9059$                                        | unpaired t-test | $1.439 \pm 0.0863$ | $t_{(14)} = 0.2722$<br>$P = 0.6152 / \text{N.S.}$ |
|                         |                        | cKO   | 8      | $P = 0.9157$                                        |                 | $1.391 \pm 0.0490$ |                                                   |
|                         | 200                    | WT    | 6      | $P = 0.9532$                                        | unpaired t-test | $1.261 \pm 0.0464$ | $t_{(14)} = 0.5261$<br>$P = 0.9130 / \text{N.S.}$ |
|                         |                        | cKO   | 8      | $P = 0.5991$                                        |                 | $1.268 \pm 0.0462$ |                                                   |
|                         | 400                    | WT    | 6      | $P = 0.9836$                                        | unpaired t-test | $1.138 \pm 0.0520$ | $t_{(14)} = 0.4437$<br>$P = 0.2877 / \text{N.S.}$ |
|                         |                        | cKO   | 8      | $P = 0.6636$                                        |                 | $1.08 \pm 0.0234$  |                                                   |
|                         | 500                    | WT    | 6      | $P = 0.7594$                                        | unpaired t-test | $1.064 \pm 0.0382$ | $t_{(14)} = 0.2749$<br>$P = 0.3669 / \text{N.S.}$ |
|                         |                        | cKO   | 8      | $P = 0.9321$                                        |                 | $1.022 \pm 0.0269$ |                                                   |

**Supplementary Figure 3D**

| Group                               | Interstimulus interval | Group  | Number | D'Agostino & Pearson test (p-value) | statistics    | Mean ±S.E.M        | P-value /Significance      |
|-------------------------------------|------------------------|--------|--------|-------------------------------------|---------------|--------------------|----------------------------|
| <i>Apoer2</i> WT<br>before vs after | 20                     | Before | 10     | $P = 0.0734$                        | paired t-test | $1.244 \pm 0.0458$ | $t_{(9)} = 0.4563$         |
|                                     |                        | after  | 10     | $P = 0.929$                         |               | $1.224 \pm 0.0309$ | $P = 0.6590 / \text{N.S.}$ |
|                                     | 30                     | Before | 10     | $P = 0.0824$                        | paired t-test | $1.304 \pm 0.0345$ | $t_{(9)} = 1.142$          |
|                                     |                        | after  | 10     | $P = 0.1665$                        |               | $1.35 \pm 0.0368$  | $P = 0.2828 / \text{N.S.}$ |
|                                     | 50                     | Before | 10     | $P = 0.7491$                        | paired t-test | $1.343 \pm 0.0397$ | $t_{(9)} = 0.0468$         |
|                                     |                        | after  | 10     | $P = 0.9538$                        |               | $1.342 \pm 0.0400$ | $P = 0.9637 / \text{N.S.}$ |
|                                     | 100                    | Before | 10     | $P = 0.5476$                        | paired t-test | $1.337 \pm 0.0268$ | $t_{(9)} = 0.1054$         |
|                                     |                        | after  | 10     | $P = 0.5005$                        |               | $1.282 \pm 0.0269$ | $P = 0.1054 / \text{N.S.}$ |
|                                     | 200                    | Before | 10     | $P = 0.8752$                        | paired t-test | $1.139 \pm 0.0252$ | $t_{(9)} = 1.010$          |
|                                     |                        | after  | 10     | $P = 0.1437$                        |               | $1.183 \pm 0.0265$ | $P = 0.3389 / \text{N.S.}$ |
|                                     | 400                    | Before | 10     | $P = 0.0675$                        | paired t-test | $1.057 \pm 0.0225$ | $t_{(9)} = 1.303$          |
|                                     |                        | after  | 10     | $P = 0.577$                         |               | $1.023 \pm 0.0141$ | $P = 0.2249 / \text{N.S.}$ |
|                                     | 500                    | Before | 10     | $P = 0.0544$                        | paired t-test | $1.032 \pm 0.0227$ | $t_{(9)} = 0.194$          |
|                                     |                        | after  | 10     | $P = 0.7463$                        |               | $1.027 \pm 0.0165$ | $P = 0.8505 / \text{N.S.}$ |

**Supplementary Figure 3E**

| Group                               | Interstimulus interval | Group  | Number | D'Agostino & Pearson test (p-value) | statistics                              | Mean ±S.E.M        | P-value /Significance      |
|-------------------------------------|------------------------|--------|--------|-------------------------------------|-----------------------------------------|--------------------|----------------------------|
| <i>Apoer2</i> KO<br>before vs after | 20                     | Before | 11     | $P = 0.824$                         | paired t-test                           | $1.28 \pm 0.0473$  | $t_{(10)} = 1.280$         |
|                                     |                        | after  | 11     | $P = 0.6983$                        |                                         | $1.318 \pm 0.0480$ | $P = 0.2294 / \text{N.S.}$ |
|                                     | 30                     | Before | 11     | $P = 0.1009$                        | paired t-test                           | $1.441 \pm 0.0556$ | $t_{(10)} = 1.290$         |
|                                     |                        | after  | 11     | $P = 0.9879$                        |                                         | $1.385 \pm 0.0455$ | $P = 0.2261 / \text{N.S.}$ |
|                                     | 50                     | Before | 11     | $P = 0.8258$                        | paired t-test                           | $1.367 \pm 0.0457$ | $t_{(10)} = 1.838$         |
|                                     |                        | after  | 11     | $P = 0.7372$                        |                                         | $1.473 \pm 0.0633$ | $P = 0.0959 / \text{N.S.}$ |
|                                     | 100                    | Before | 11     | $P = 0.2092$                        | paired t-test                           | $1.453 \pm 0.0501$ | $t_{(10)} = 0.5680$        |
|                                     |                        | after  | 11     | $P = 0.8359$                        |                                         | $1.422 \pm 0.0426$ | $P = 0.5826 / \text{N.S.}$ |
|                                     | 200                    | Before | 11     | $P = 0.0053$                        | Wilcoxon matched-pairs signed rank test | $1.202 \pm 0.0593$ | $P = 0.2061 / \text{N.S.}$ |
|                                     |                        | after  | 11     | $P = 0.8991$                        |                                         | $1.266 \pm 0.0135$ |                            |
|                                     | 400                    | Before | 11     | $P = 0.7766$                        | paired t-test                           | $1.069 \pm 0.0233$ | $t_{(10)} = 0.0538$        |
|                                     |                        | after  | 11     | $P = 0.2795$                        |                                         | $1.071 \pm 0.0258$ | $P = 0.9581 / \text{N.S.}$ |
|                                     | 500                    | Before | 11     | $P = 0.007$                         | Wilcoxon matched-pairs signed rank test | $1.019 \pm 0.0324$ | $P = 0.3652 / \text{N.S.}$ |
|                                     |                        | after  | 11     | $P = 0.5377$                        |                                         | $1.034 \pm 0.0205$ |                            |

**Supplementary Figure 3F**

| Group                      | Interstimulus interval | Group | Number | D'Agostino & Pearson test (p-value) | statistics        | Mean ±S.E.M        | P-value /Significance      |
|----------------------------|------------------------|-------|--------|-------------------------------------|-------------------|--------------------|----------------------------|
| <i>Apoer2</i><br>WT vs cKO | 20                     | WT    | 10     | $P = 0.0734$                        | unpaired t-test   | $1.244 \pm 0.0458$ | $t_{(19)} = 0.5380$        |
|                            |                        | cKO   | 11     | $P = 0.824$                         |                   | $1.28 \pm 0.0473$  | $P = 0.5968 / \text{N.S.}$ |
|                            | 30                     | WT    | 10     | $P = 0.0824$                        | unpaired t-test   | $1.304 \pm 0.0345$ | $t_{(19)} = 2.038$         |
|                            |                        | cKO   | 11     | $P = 0.1009$                        |                   | $1.441 \pm 0.0556$ | $P = 0.0557 / \text{N.S.}$ |
|                            | 50                     | WT    | 10     | $P = 0.7491$                        | unpaired t-test   | $1.343 \pm 0.0397$ | $t_{(19)} = 0.3905$        |
|                            |                        | cKO   | 11     | $P = 0.8258$                        |                   | $1.367 \pm 0.0457$ | $P = 0.7005 / \text{N.S.}$ |
|                            | 100                    | WT    | 10     | $P = 0.5476$                        | unpaired t-test   | $1.337 \pm 0.0268$ | $t_{(19)} = 1.978$         |
|                            |                        | cKO   | 11     | $P = 0.2092$                        |                   | $1.453 \pm 0.0501$ | $P = 0.0627 / \text{N.S.}$ |
|                            | 200                    | WT    | 10     | $P = 0.8752$                        | Mann Whitney test | $1.139 \pm 0.0252$ | $P = 0.5116 / \text{N.S.}$ |
|                            |                        | cKO   | 11     | $P = 0.0053$                        |                   | $1.202 \pm 0.0593$ |                            |
|                            | 400                    | WT    | 10     | $P = 0.0675$                        | unpaired t-test   | $1.057 \pm 0.2247$ | $t_{(19)} = 0.3619$        |
|                            |                        | cKO   | 11     | $P = 0.7766$                        |                   | $1.069 \pm 0.0233$ | $P = 0.7214 / \text{N.S.}$ |
|                            | 500                    | WT    | 10     | $P = 0.0544$                        | Mann Whitney test | $1.032 \pm 0.0227$ | $P = 0.4679 / \text{N.S.}$ |
|                            |                        | cKO   | 11     | $P = 0.007$                         |                   | $1.019 \pm 0.0324$ |                            |

**Supplementary Figure 3G**

| Group                  | Interstimulus interval | Group  | Number | D'Agostino & Pearson test (p-value) | statistics    | Mean ±S.E.M        | P-value /Significance      |
|------------------------|------------------------|--------|--------|-------------------------------------|---------------|--------------------|----------------------------|
| Veh<br>before vs after | 20                     | Before | 9      | $P = 0.8364$                        | paired t-test | $1.374 \pm 0.0474$ | $t_{(8)} = 1.245$          |
|                        |                        | after  | 9      | $P = 0.8843$                        |               | $1.327 \pm 0.0542$ | $P = 0.2485 / \text{N.S.}$ |
|                        | 30                     | Before | 9      | $P = 0.3648$                        | paired t-test | $1.477 \pm 0.0661$ | $t_{(8)} = 1.102$          |
|                        |                        | after  | 9      | $P = 0.1224$                        |               | $1.425 \pm 0.0586$ | $P = 0.3023 / \text{N.S.}$ |
|                        | 50                     | Before | 9      | $P = 0.5254$                        | paired t-test | $1.526 \pm 0.0692$ | $t_{(8)} = 0.1199$         |
|                        |                        | after  | 9      | $P = 0.0980$                        |               | $1.522 \pm 0.0825$ | $P = 0.9075 / \text{N.S.}$ |
|                        | 100                    | Before | 9      | $P = 0.2827$                        | paired t-test | $1.463 \pm 0.0757$ | $t_{(8)} = 0.1089$         |
|                        |                        | after  | 9      | $P = 0.3510$                        |               | $1.457 \pm 0.0557$ | $P = 0.9610 / \text{N.S.}$ |
|                        | 200                    | Before | 9      | $P = 0.8726$                        | paired t-test | $1.201 \pm 0.0463$ | $t_{(8)} = 0.7661$         |
|                        |                        | after  | 9      | $P = 0.7627$                        |               | $1.230 \pm 0.0452$ | $P = 0.4656 / \text{N.S.}$ |
|                        | 400                    | Before | 9      | $P = 0.5238$                        | paired t-test | $1.108 \pm 0.0287$ | $t_{(8)} = 0.3182$         |
|                        |                        | after  | 9      | $P = 0.8935$                        |               | $1.121 \pm 0.0395$ | $P = 0.7585 / \text{N.S.}$ |
|                        | 500                    | Before | 9      | $P = 0.7273$                        | paired t-test | $1.068 \pm 0.0415$ | $t_{(8)} = 0.3414$         |
|                        |                        | after  | 9      | $P = 0.4159$                        |               | $1.090 \pm 0.0333$ | $P = 0.7416 / \text{N.S.}$ |

**Supplementary Figure 3H**

| Group               | Interstimulus interval | Group  | Number | D'Agostino & Pearson test (p-value) | statistics                              | Mean ±S.E.M        | P-value /Significance      |
|---------------------|------------------------|--------|--------|-------------------------------------|-----------------------------------------|--------------------|----------------------------|
| PP2 before vs after | 20                     | Before | 10     | $P = 0.6898$                        | paired t-test                           | $1.316 \pm 0.0371$ | $t_{(9)} = 0.8655$         |
|                     |                        | after  | 10     | $P = 0.4578$                        |                                         | $1.365 \pm 0.0335$ | $P = 0.4092 / \text{N.S.}$ |
|                     | 30                     | Before | 10     | $P = 0.1444$                        | paired t-test                           | $1.399 \pm 0.0452$ | $t_{(9)} = 1.197$          |
|                     |                        | after  | 10     | $P = 0.5749$                        |                                         | $1.487 \pm 0.0790$ | $P = 0.2619 / \text{N.S.}$ |
|                     | 50                     | Before | 10     | $P = 0.472$                         | paired t-test                           | $1.483 \pm 0.0367$ | $t_{(9)} = 1.097$          |
|                     |                        | after  | 10     | $P = 0.5099$                        |                                         | $1.541 \pm 0.0554$ | $P = 0.3011 / \text{N.S.}$ |
|                     | 100                    | Before | 10     | $P = 0.0219$                        | Wilcoxon matched-pairs signed rank test | $1.402 \pm 0.0367$ | $P = 0.8457 / \text{N.S.}$ |
|                     |                        | after  | 10     | $P = 0.4623$                        |                                         | $1.386 \pm 0.0539$ |                            |
|                     | 200                    | Before | 10     | $P = 0.9028$                        | paired t-test                           | $1.277 \pm 0.0560$ | $t_{(9)} = 2.002$          |
|                     |                        | after  | 10     | $P = 0.4046$                        |                                         | $1.158 \pm 0.0303$ | $P = 0.0763 / \text{N.S.}$ |
|                     | 400                    | Before | 10     | $P = 0.1271$                        | paired t-test                           | $1.088 \pm 0.0343$ | $t_{(9)} = 0.1962$         |
|                     |                        | after  | 10     | $P = 0.6994$                        |                                         | $1.078 \pm 0.0430$ | $P = 0.8488 / \text{N.S.}$ |
|                     | 500                    | Before | 10     | $P = 0.001$                         | Wilcoxon matched-pairs signed rank test | $1.106 \pm 0.0587$ | $P = 0.6953 / \text{N.S.}$ |
|                     |                        | after  | 10     | $P = 0.3228$                        |                                         | $1.082 \pm 0.0411$ |                            |

**Supplementary Figure 3I**

| Group      | Interstimulus interval | Group | Number | D'Agostino & Pearson test (p-value) | statistics        | Mean ±S.E.M        | P-value /Significance      |
|------------|------------------------|-------|--------|-------------------------------------|-------------------|--------------------|----------------------------|
| Veh vs PP2 | 20                     | Veh   | 9      | $P = 0.8364$                        | unpaired t-test   | $1.417 \pm 0.0454$ | $t_{(17)} = 1.722$         |
|            |                        | PP2   | 10     | $P = 0.6898$                        |                   | $1.316 \pm 0.0371$ | $P = 0.1400 / \text{N.S.}$ |
|            | 30                     | Veh   | 9      | $P = 0.3648$                        | unpaired t-test   | $1.458 \pm 0.0595$ | $t_{(17)} = 0.7909$        |
|            |                        | PP2   | 10     | $P = 0.1444$                        |                   | $1.399 \pm 0.0452$ | $P = 0.2715 / \text{N.S.}$ |
|            | 50                     | Veh   | 9      | $P = 0.5254$                        | unpaired t-test   | $1.577 \pm 0.0545$ | $t_{(17)} = 1.598$         |
|            |                        | PP2   | 10     | $P = 0.472$                         |                   | $1.483 \pm 0.0367$ | $P = 0.0637 / \text{N.S.}$ |
|            | 100                    | Veh   | 9      | $P = 0.2827$                        | Mann Whitney test | $1.483 \pm 0.0742$ | $P = 0.8244 / \text{N.S.}$ |
|            |                        | PP2   | 10     | $P = 0.0219$                        |                   | $1.402 \pm 0.0367$ |                            |
|            | 200                    | Veh   | 9      | $P = 0.8726$                        | unpaired t-test   | $1.216 \pm 0.0373$ | $t_{(17)} = 0.8794$        |
|            |                        | PP2   | 10     | $P = 0.9028$                        |                   | $1.277 \pm 0.0560$ | $P = 0.6610 / \text{N.S.}$ |
|            | 400                    | Veh   | 9      | $P = 0.5238$                        | unpaired t-test   | $1.081 \pm 0.0317$ | $t_{(17)} = 0.1425$        |
|            |                        | PP2   | 10     | $P = 0.1271$                        |                   | $1.088 \pm 0.0343$ | $P = 0.8461 / \text{N.S.}$ |
|            | 500                    | Veh   | 9      | $P = 0.7273$                        | Mann Whitney test | $1.071 \pm 0.0338$ | $P = 0.9514 / \text{N.S.}$ |
|            |                        | PP2   | 10     | $P = 0.001$                         |                   | $1.106 \pm 0.0587$ |                            |

**Supplementary Figure 3J**

| Group                  | Interstimulus interval | Group  | Number | Shapiro-Wilk (p-value) | statistics                              | Mean ±S.E.M        | P-value /Significance      |
|------------------------|------------------------|--------|--------|------------------------|-----------------------------------------|--------------------|----------------------------|
| Veh<br>before vs after | 20                     | Before | 7      | $P = 0.1851$           | paired t-test                           | $1.333 \pm 0.0927$ | $t_{(6)} = 0.7683$         |
|                        |                        | after  | 7      | $P = 0.5558$           |                                         | $1.29 \pm 0.0277$  | $P = 0.4714 / \text{N.S.}$ |
|                        | 30                     | Before | 7      | $P = 0.7915$           | paired t-test                           | $1.447 \pm 0.0564$ | $t_{(6)} = 2.337$          |
|                        |                        | after  | 7      | $P = 0.118$            |                                         | $1.334 \pm 0.0299$ | $P = 0.0581 / \text{N.S.}$ |
|                        | 50                     | Before | 7      | $P = 0.3773$           | paired t-test                           | $1.424 \pm 0.0267$ | $t_{(6)} = 1.701$          |
|                        |                        | after  | 7      | $P = 0.3384$           |                                         | $1.461 \pm 0.0229$ | $P = 0.1399 / \text{N.S.}$ |
|                        | 100                    | Before | 7      | $P = 0.7307$           | paired t-test                           | $1.373 \pm 0.0254$ | $t_{(6)} = 0.2453$         |
|                        |                        | after  | 7      | $P = 0.3604$           |                                         | $1.386 \pm 0.0524$ | $P = 0.8144 / \text{N.S.}$ |
|                        | 200                    | Before | 7      | $P = 0.2479$           | Wilcoxon matched-pairs signed rank test | $1.263 \pm 0.0231$ | $P = 0.4688 / \text{N.S.}$ |
|                        |                        | after  | 7      | $P = 0.0268$           |                                         | $1.228 \pm 0.0467$ |                            |
|                        | 400                    | Before | 7      | $P = 0.8958$           | paired t-test                           | $1.063 \pm 0.0198$ | $t_{(6)} = 2.057$          |
|                        |                        | after  | 7      | $P = 0.9418$           |                                         | $1.132 \pm 0.0337$ | $P = 0.0854 / \text{N.S.}$ |
|                        | 500                    | Before | 7      | $P = 0.0086$           | Wilcoxon matched-pairs signed rank test | $1.026 \pm 0.0572$ | $P = 0.2188 / \text{N.S.}$ |
|                        |                        | after  | 7      | $P = 0.4309$           |                                         | $0.98 \pm 0.0315$  |                            |

**Supplementary Figure 3K**

| Group                        | Interstimulus interval | Group  | Number | Shapiro-Wilk (p-value) | statistics                              | Mean ±S.E.M        | P-value /Significance      |
|------------------------------|------------------------|--------|--------|------------------------|-----------------------------------------|--------------------|----------------------------|
| LY293,002<br>before vs after | 20                     | Before | 7      | $P = 0.0156$           | Wilcoxon matched-pairs signed rank test | $1.357 \pm 0.0299$ | $P = 0.8125 / \text{N.S.}$ |
|                              |                        | after  | 7      | $P = 0.3524$           |                                         | $1.364 \pm 0.0484$ |                            |
|                              | 30                     | Before | 7      | $P = 0.0925$           | paired t-test                           | $1.449 \pm 0.0423$ | $t_{(6)} = 0.3122$         |
|                              |                        | after  | 7      | $P = 0.4323$           |                                         | $1.464 \pm 0.0324$ | $P = 0.7655 / \text{N.S.}$ |
|                              | 50                     | Before | 7      | $P = 0.7928$           | paired t-test                           | $1.453 \pm 0.0691$ | $t_{(6)} = 1.646$          |
|                              |                        | after  | 7      | $P = 0.5773$           |                                         | $1.531 \pm 0.0761$ | $P = 0.1509 / \text{N.S.}$ |
|                              | 100                    | Before | 7      | $P = 0.4242$           | Wilcoxon matched-pairs signed rank test | $1.442 \pm 0.0294$ | $P = 0.9375 / \text{N.S.}$ |
|                              |                        | after  | 7      | $P = 0.0028$           |                                         | $1.420 \pm 0.0355$ |                            |
|                              | 200                    | Before | 7      | $P = 0.9707$           | paired t-test                           | $1.206 \pm 0.0741$ | $t_{(6)} = 0.0780$         |
|                              |                        | after  | 7      | $P = 0.5693$           |                                         | $1.204 \pm 0.0679$ | $P = 0.9404 / \text{N.S.}$ |
|                              | 400                    | Before | 7      | $P = 0.0530$           | paired t-test                           | $1.125 \pm 0.0473$ | $t_{(6)} = 2.193$          |
|                              |                        | after  | 7      | $P = 0.9204$           |                                         | $1.043 \pm 0.0500$ | $P = 0.0708 / \text{N.S.}$ |
|                              | 500                    | Before | 7      | $P = 0.7137$           | Wilcoxon matched-pairs signed rank test | $1.045 \pm 0.0225$ | $P > 0.9999 / \text{N.S.}$ |
|                              |                        | after  | 7      | $P = 0.0372$           |                                         | $1.048 \pm 0.0439$ |                            |

**Supplementary Figure 3L**

| Group            | Interstimulus interval | Group     | Number | Shapiro-Wilk (p-value) | statistics        | Mean ±S.E.M        | P-value /Significance                             |
|------------------|------------------------|-----------|--------|------------------------|-------------------|--------------------|---------------------------------------------------|
| Veh vs LY293,002 | 20                     | Veh       | 7      | $P = 0.1851$           | Mann Whitney test | $1.333 \pm 0.0627$ | $P = 0.2593 / \text{N.S.}$                        |
|                  |                        | LY293,002 | 7      | $P = 0.0156$           |                   | $1.357 \pm 0.0299$ |                                                   |
|                  | 30                     | Veh       | 7      | $P = 0.7915$           | unpaired t-test   | $1.447 \pm 0.0564$ | $t_{(12)} = 0.0362$<br>$P = 0.9717 / \text{N.S.}$ |
|                  |                        | LY293,002 | 7      | $P = 0.0925$           |                   | $1.449 \pm 0.0423$ |                                                   |
|                  | 50                     | Veh       | 7      | $P = 0.3773$           | unpaired t-test   | $1.424 \pm 0.0267$ | $t_{(12)} = 0.3965$<br>$P = 0.6987 / \text{N.S.}$ |
|                  |                        | LY293,002 | 7      | $P = 0.7928$           |                   | $1.453 \pm 0.0691$ |                                                   |
|                  | 100                    | Veh       | 7      | $P = 0.7307$           | unpaired t-test   | $1.373 \pm 0.0254$ | $t_{(12)} = 1.777$<br>$P = 0.1010 / \text{N.S.}$  |
|                  |                        | LY293,002 | 7      | $P = 0.4242$           |                   | $1.442 \pm 0.0294$ |                                                   |
|                  | 200                    | Veh       | 7      | $P = 0.2479$           | unpaired t-test   | $1.263 \pm 0.0231$ | $t_{(12)} = 0.7361$<br>$P = 0.4758 / \text{N.S.}$ |
|                  |                        | LY293,002 | 7      | $P = 0.9707$           |                   | $1.206 \pm 0.0741$ |                                                   |
|                  | 400                    | Veh       | 7      | $P = 0.8958$           | unpaired t-test   | $1.063 \pm 0.0198$ | $t_{(12)} = 1.196$<br>$P = 0.2548 / \text{N.S.}$  |
|                  |                        | LY293,002 | 7      | $P = 0.0530$           |                   | $1.125 \pm 0.0473$ |                                                   |
|                  | 500                    | Veh       | 7      | $P = 0.0086$           | Mann Whitney test | $1.026 \pm 0.0572$ | $p = 0.9015 / \text{N.S.}$                        |
|                  |                        | LY293,002 | 7      | $P = 0.7137$           |                   | $1.045 \pm 0.0225$ |                                                   |

**Supplementary Figure 4B**

| Group   | N number | Mean ±S.E.M       | D'Agostino & Pearson test (p-value) | Statistics        | P-value /Significance |
|---------|----------|-------------------|-------------------------------------|-------------------|-----------------------|
| Veh-Ket | 10       | $129.5 \pm 6.012$ | $P = 0.3928$                        | Mann-Whitney test | $P = 0.0089 / **$     |
| AZD-Ket | 10       | $109.3 \pm 3.228$ | $P = 0.0012$                        |                   |                       |
